# Supplementary material for: Racial Ethnic Disparities in Youth With Type 1 Diabetes Participating in Diabetes Summer Camps
Source: Oxford University Press journal article supplement (doi:10.2337/dc19-1502), 2020-01-23

## SUPPLEMENTARY DATA

**Supplementary Table 1 Legend:** Data are means and standard deviations. Race/ethnicity and HbA1c were self-reported. We eliminated HbA1c data that was reported below 4% (n=7) or above 15% (n=28; this included data that appeared to be blood glucose levels in mg/dL e.g., 150, 230).

**Supplementary Figure 1 Legend:** Camp programs for children with type 1 diabetes were held at 44 sites, included 48 programs, and 54 sessions. The ADA camp map also includes Project Power camps, diabetes retreats and other ADA funded camps.

**Supplementary Figure 2 Legend:** Percentage of patients in each racial/ethnic group from the SEARCH and ADA camp populations, respectively. \*indicates specific comparisons with standardized residuals  $\geq 2$  or  $< -2$ .

SUPPLEMENTARY DATA

**Supplementary Table 1.** Camper Sociodemographic and clinical characteristics (N=5256)

|                                      | n(%) or M $\pm$ SD |
|--------------------------------------|--------------------|
| Gender - Female                      | 2885 (54.9%)       |
| Age at camp attendance (in years)    | 11.8 $\pm$ 2.8     |
| Diabetes Duration (in years; n=5069) | 5.4 $\pm$ 3.5      |
| <i>Race/ethnicity (n=5252)</i>       |                    |
| White                                | 4394 (83.7%)       |
| Black                                | 258 (4.9%)         |
| Hispanic                             | 207 (3.9%)         |
| Asian Pacific Islander               | 52 (1.0%)          |
| American Indian                      | 53 (1.0%)          |
| Multiracial                          | 201 (3.8%)         |
| Other                                | 87 (1.7%)          |
| <i>Household Income (n=3906)</i>     |                    |
| <25,000                              | 545 (14.0%)        |
| 25,00-50000                          | 756 (19.4%)        |
| 50000-75000                          | 647 (16.5%)        |
| 75000-100000                         | 714 (18.3%)        |
| 100,000- 150,000                     | 697 (17.8%)        |
| >150,000                             | 547 (14.0%)        |
| <i>Camp Type Attended</i>            |                    |
| Day camp                             | 1098 (20.9%)       |
| Residential camp                     | 4158 (79.1%)       |
| First time camper                    | 1628 (31.0%)       |
| Insulin Pump (n=5016)                | 3667 (73.1%)       |
| Continuous Glucose Monitor (n=5216)  | 3023 (58.0%)       |
| Hemoglobin A1c (%; n=4856)           | 8.3 $\pm$ 1.4      |

## SUPPLEMENTARY DATA

### Supplementary Figure 1. ADA-affiliated diabetes camp programs map

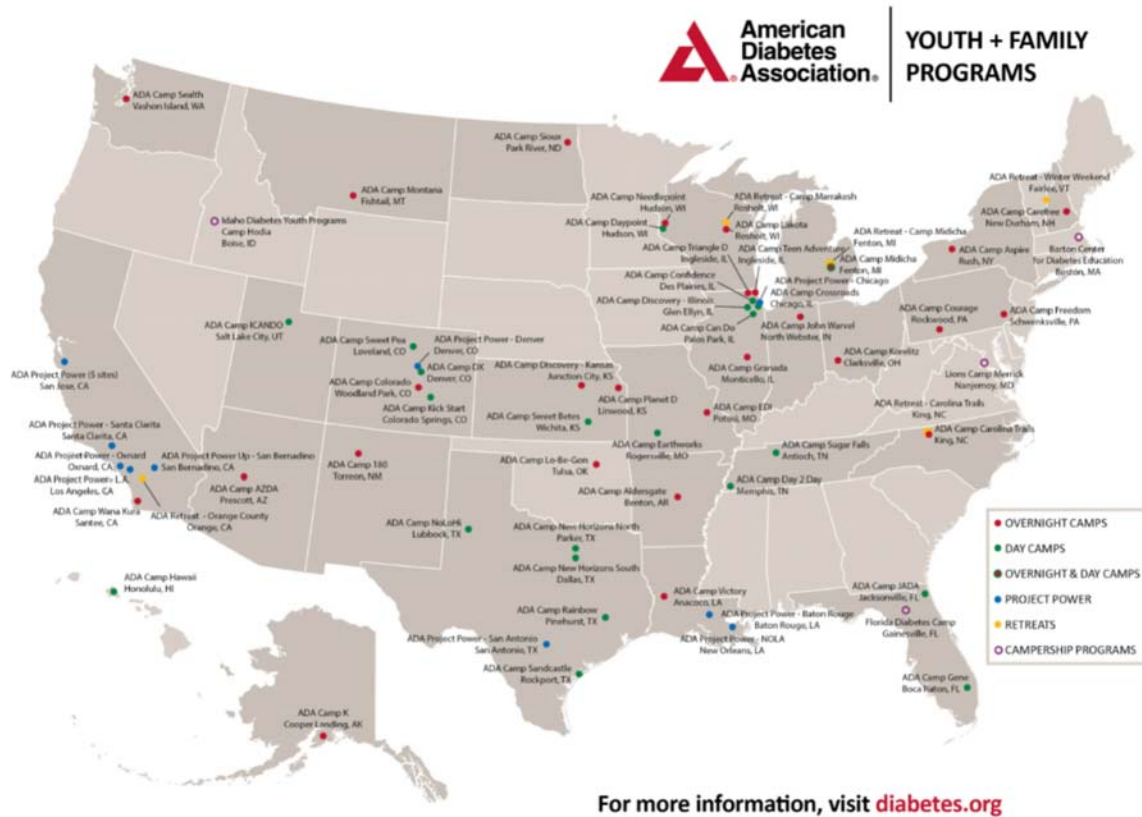

SUPPLEMENTARY DATA

**Supplementary Figure 2.** Racial/Ethnic comparison to SEARCH population data

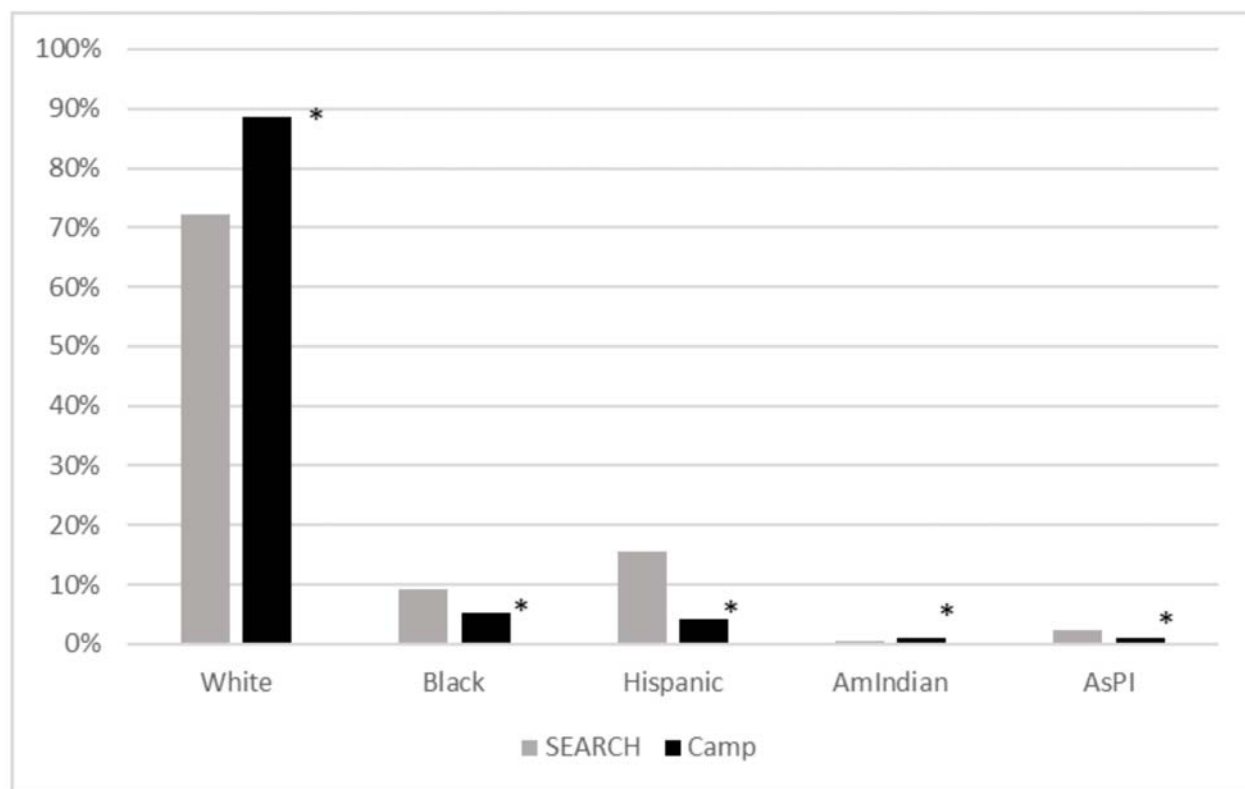

Supplement: dc191502supplementarydata.pdf [file dc191502supplementarydata.pdf]
